# Supplementary material
Source: PubMed Central journal article supplement (PMC5303624)
Supplement: NIHMS847002-supplement.pdf [file NIHMS847002-supplement.pdf]

## **Supplementary Information For**

# Vernalization-triggered intragenic chromatin-loop formation by long noncoding RNAs

Dong-Hwan Kim & Sibum Sung

correspondence to: [sbsung@austin.utexas.edu](mailto:sbsung@austin.utexas.edu)

## **This includes:**

Supplementary Table 1

Supplementary Figs. 1 to 6

**Supplementary Table 1. Related to Figures 1 ~ 6 and Supplementary Figures S1 ~ S6.**  
Sequence information of primers used in this study.

| Name            | Forward                                    | Reverse                              | Use               |
|-----------------|--------------------------------------------|--------------------------------------|-------------------|
| FLC             | gccaaagaagaccgaactcatgttga                 | caaccgccgatttaaggtggcta              | qRT-PCR           |
| PP2A            | tatcggatgacgattcttcgtgcag                  | gcttggtcgactatcggaatgagag            | qRT-PCR           |
| FT              | ggaacaacctttggcaatgagat                    | ctgccaaagctgtcgaacaa                 | qRT-PCR           |
| COOLAIR         | tgtatgtgtcttcactctgtcaa                    | gccgtaggcttctcactgt                  | qRT-PCR           |
| COLDAIR         | ggccacgcgtcgactagtac                       | agtagacactacaccagattcaatttgac        | qRT-PCR           |
| COLDWRAP        | aggaaagatagttttcatttagcaacgaaagtg          | gacgagcgtctttgctacttttgacattg        | qRT-PCR           |
| COLDWRAP-KD     | caccaggaaagatagttttcatttagcaacgaaagtg      | caagattgccacgtgtaccgcatgac           | RNAi construct    |
| COLDWRAP-Full   | aggaaagatagttttcatttagcaacgaaagtg          | ctttgtgccctaatttgatcctcagggttg       | RNA binding assay |
| COLDWRAP-5'RACE | gaaagtgaactaaggcaatgcaaaagtacg             | gttgtgtttgaagacaagattgccacg          | 5'RACE            |
| COLDWRAP-pBLUE  | aaggtaccgggggtaaacgagagtgtgcaaaaaa         | aagagctcaggaaagatagttttcatttagcaacg  | RNA blot probe    |
| P5              | gaaagtgaactaaggcaatgcaaaagtacg             | gttgtgtttgaagacaagattgccacg          | RT-PCR            |
| P8              | atgggaagaaaaaactagaatcaagcgaattg           | tgcgtcacagagaaacagaaagctgacg         | RT-PCR            |
| FLC-P1          | cgtgagtcgccctgatagc                        | ggaccaaaccacacacaaagactttc           | ChIP              |
| FLC-P2          | cttagtatctccggcgacttgaacc                  | gcgtcacagagaaacagaaagctga            | ChIP              |
| FLC-P3          | acacaacctttgtatctgtgtctttg                 | agtagacactacaccagattcaatttgac        | ChIP              |
| FLC-P4          | gtgaatagtgatttgacatgattatcgtacag           | ggtaggctaattagtagtgggagagtcac        | ChIP              |
| AG              | gtgaacaaatttcctgcagaatgtcact               | agtgtttgaggcactaaaatcttgggtaaatc     | ChIP & RIP        |
| UBQ10           | aggtggaagctccgacaccatcg                    | agctgcttgcggcgaaaataagcc             | ChIP & RIP        |
| PP2A            | agcctttatacccgattgtgtgcttatcg              | cctctcctcacaagagcagcagc              | ChIP & RIP        |
| A               | aggaaagatagttttcatttagcaacgaaagtg          | gttgtgtttgaagacaagattgccacgtg        | RIP               |
| B               | cttagtatctccggcgacttgaacc                  | gcgtcacagagaaacagaaagctga            | RIP               |
| C               | tacaacctccaataataaaccaaatgggtg             | cacgttctaaaaggcttcttatttataatc       | RIP               |
| D               | gtgaatagtgatttgacatgattatcgtacag           | ggtaggctaattagtagtgggagagtcac        | RIP               |
| 3C-F1           | catgaaatcatttggcagtagcattttgtgg            |                                      | 3C                |
| 3C-F3           | ggctagatagcagtgtagcgaagatttggg             |                                      | 3C                |
| 3C-F4           | cgcttagtatctccggcgacttgaacc                |                                      | 3C                |
| 3C-F5           | ccctttatcttctgtttgtgctcttttactttctgag      |                                      | 3C                |
| 3C-F7           | gaagagtttaattatatacacaaagactaatgattaatgtct |                                      | 3C                |
| 3C-F8           | cggatttgtatgcaatgcacttacggg                |                                      | 3C                |
| 3C-F10          | cacgtccgggagatttataataaaatagtagt           |                                      | 3C                |
| 3C-F11          | gcctctaggaattgaaatcccacaac                 |                                      | 3C                |
| 3C-F13          | gcaagagcttaactcacataggactgatatc            |                                      | 3C                |
| 3C-F15          | cacgctttgtaaaggataggtgtttttgagc            |                                      | 3C                |
| 3C-F17          | ctgtcttttaccgcttctctgtcc                   |                                      | 3C                |
| 3C-F19          | tatgttttgattccaaattctgaagtgttaggt          |                                      | 3C                |
| 3C-F20          | gaagggtgtgtaaacgtgtctatatttaagttaatcac     |                                      | 3C                |
| 3C-F21          | accgacctctccatattttcttggac                 |                                      | 3C                |
| 3C-F22          | ctcgccgagtagcgcgagg                        |                                      | 3C                |
| 3C-R4           |                                            | cgtgtgatttctagttttttcttccatggc       | 3C                |
| 3C-R9           |                                            | gtatatatacattgttcagcatttaacccatagcaa | 3C                |
| 3C-R11          |                                            | gacactacaccagattcaatttgacaacttatatat | 3C                |
| 3C-R13          |                                            | cttcatagaagggaagcgactaagacag         | 3C                |
| 3C-R15          |                                            | ctaattgcaacctctatcagagattcagagcttcc  | 3C                |
| 3C-R17          |                                            | gtagctcatagtgtaaccatagtcagagc        | 3C                |
| 3C-R19          |                                            | cctgttctcttcttcagcattttctcctg        | 3C                |
| 3C-R20          |                                            | gcactactctagacacttgaggttgaac         | 3C                |
| 3C-R21          |                                            | gggaaaaaaagaagtgtatcattatataaatgtg   | 3C                |
| 3C-R22          |                                            | ggtaggtgtaagtgtatcgcatctgtg          | 3C                |
| PP2A-LC         | Ctcttagattgggacggcacaagtttc                | ctcaattccgctctgagataattcaagg         | 3C                |
| P1              | TAAGTTTGAGCTATTGCCATATGTG                  | ATAGTAAAAACAAAGAACCCAC               | Tiling PCR        |
| P2              | TGTGTTAATCTCCCGAACATTATTA                  | GTAGACATATCGAAACCTAAA                | Tiling PCR        |
| P3              | TGTAGGCACGACTTTGGTAACAC                    | TTTTCACTTTCGTTGTAAATG                | Tiling PCR        |

|     |                              |                         |            |
|-----|------------------------------|-------------------------|------------|
| P4  | CATAGTTCAAAGATGATGTAGAGT     | GCAAAAAACCAAAATATGTGA   | Tiling PCR |
| P5  | ACTAAGGCAATGCAAAAGTAGCA      | TTCTTTTCTCGCTTATTTCTT   | Tiling PCR |
| P6  | CATCACTCTCGTTACCCCA          | TGGCTTCTCTCCGAGAGG      | Tiling PCR |
| P7  | AAAAAAAAAATAGAAAGAGAAAA      | TGACGAGCTTCTCGATGAGA    | Tiling PCR |
| P8  | ATGGGAAGAAAAAACTAGAAAT       | AAAAGGCGTACTTATCGCCGG   | Tiling PCR |
| P9  | AGCTTTCTGTTCTCTGTGACG        | AACCAAACGGTATATTAATTGT  | Tiling PCR |
| P10 | TCCTTACCTGGGTTTTCATTGTTC     | GTTCTTCCTTAAATTTGGTTAT  | Tiling PCR |
| P11 | TTTTCCGGCGGATCTCTTG          | TTCCAAGGAAATAATGAAATC   | Tiling PCR |
| P12 | CAATGTCGTGAAGAAGCTTTTAG      | CTAAAGGTAAGAAACAATCAA   | Tiling PCR |
| P13 | AAAAAATTGCATGTCATTACGAT      | ACAAATCCGAGAGATCCAATG   | Tiling PCR |
| P14 | GAGATTCTTAAGTTTTTGAAGAG      | ATAGTCTTATATAGTCAATAGCT | Tiling PCR |
| P15 | TATGCAATGCACTTACGGGAG        | CTACTGTGTATGAAAAATATGA  | Tiling PCR |
| P16 | TTGTTAATCTTCTATGAATTCCTAT    | AAAGAATCGCAATCGATAACC   | Tiling PCR |
| P17 | GTTTTGAATTTTGGTAGCTTCAAA     | ACAAATCCAAGAGAACAATGA   | Tiling PCR |
| P18 | TGAATCACAATCGTCGTGTGCTAT     | TTCCCAATTAATGTGGCTTACA  | Tiling PCR |
| P19 | tatatgcacgtccggagattataataaa | ATAAACCTTTGGACAATCTTTA  | Tiling PCR |
| P20 | AACTATGACTAAAAGATGAATTGG     | TAAATGAACACAACGATGATA   | Tiling PCR |
| P21 | TAGTTTCCCACTCTTGCAGTTACA     | TGACAAAAGACACAAGATACA   | Tiling PCR |
| P22 | ATGACTTTGTTCTTATTCGTTAAAA    | GACAAGTGTGTGGGATTTTC    | Tiling PCR |
| P23 | ACACAACCTTTGTATCTTGTGTCTT    | AGTAGACACTACACCAGATTTC  | Tiling PCR |
| P24 | CTTCATGTAAGAAATACCAACCTC     | CAAATCCTAACAAAGTATGCAT  | Tiling PCR |
| P25 | TACAACCTCCAATATAATAACCA      | CACGTCTAAAAGGCTTCTTCT   | Tiling PCR |
| P26 | CAAGTGGGGATCAATCCAGG         | ACTAATTTGTTTTGTAAATAG   | Tiling PCR |
| P27 | GAACCCCTAGTTACTCAGTTACTC     | CATATCTATAAATATATCTTCCA | Tiling PCR |
| P28 | ACTTCAAAACAGTTTTAAACAACCT    | CAATTTCTATATTTAAACCCC   | Tiling PCR |
| P29 | GTGTGATAAGTTTCTACTAATATT     | TTTTTTTTGCAAATATCAAAAG  | Tiling PCR |
| P30 | GGAACCTCACAGTTTCTATAAACG     | GATGTGGCGGTAACCAGATAA   | Tiling PCR |
| P31 | CATATACAATAGAAATATGAGTTTT    | AACATATACGAGAAAACTTTT   | Tiling PCR |
| P32 | CATCATTATCATCTTATGGGTCATC    | TAAAAAGAATTTTAAAAAC     | Tiling PCR |
| P33 | TGATATGGTATTACTTACAAACAAA    | CCTCTATTTCTATCATGTTTAC  | Tiling PCR |
| P34 | AAAACCTGGGATACAAAAAGAAAA     | ATTTTGGTTTGTATCCATACCA  | Tiling PCR |
| P35 | GGTAAATAGGTTTGTCTTATAAT      | TCCCTAACAAATAGCAAATAGTG | Tiling PCR |
| P36 | TGGAAGCTCTGAATCTCTGATAGA     | ATGTGATGACATGGAAGTAAA   | Tiling PCR |
| P37 | AAGTCTTTCAGTTAATTTCAAGAA     | TAAACGCAGCCCCAATCTTAA   | Tiling PCR |
| P38 | TTGTGGCTCATCAATATATGTGTGT    | GAAAATGACATTTTCCCTCAA   | Tiling PCR |
| P39 | ACATTTTATATTGCATCAATTATTC    | GAAAATGACATTTTCCCTCAA   | Tiling PCR |
| P40 | CCTTAACTAGTTTGACTTTAAGTTA    | GAAAAGAAAAAGAACCAAAAC   | Tiling PCR |
| P41 | CAATCTGCCGAAATATATAATAAAT    | GTAGCACATCTGAATTTCCACT  | Tiling PCR |
| P42 | CTTGAGAGAGAAAAAAATATCA       | ATGAAACATTGAGAGAACACC   | Tiling PCR |
| P43 | CTGCTTAAACATGAATATTAAGATT    | ATCGATCAAGGATCTTGACCA   | Tiling PCR |

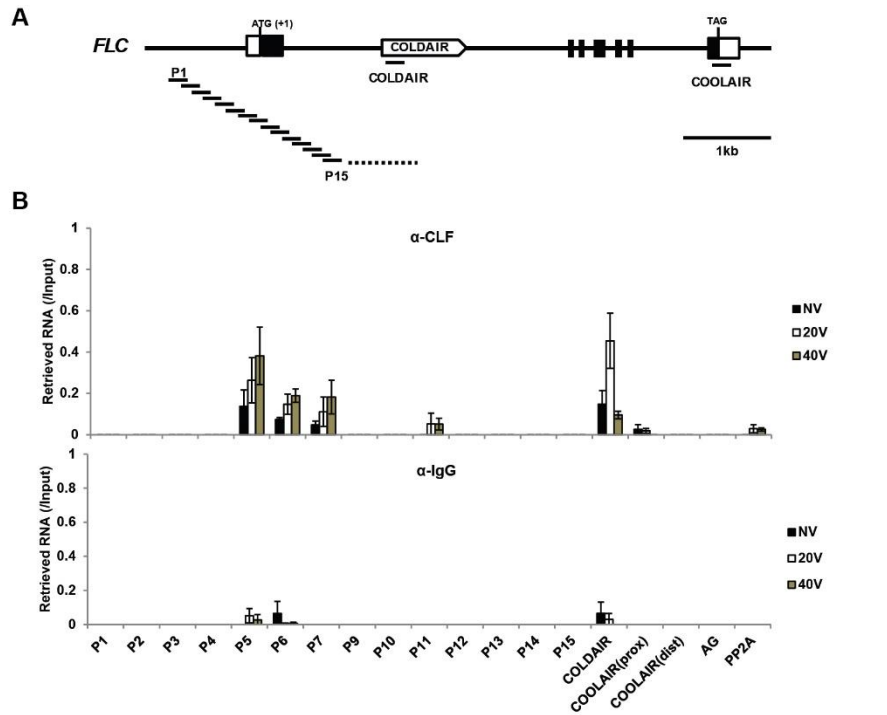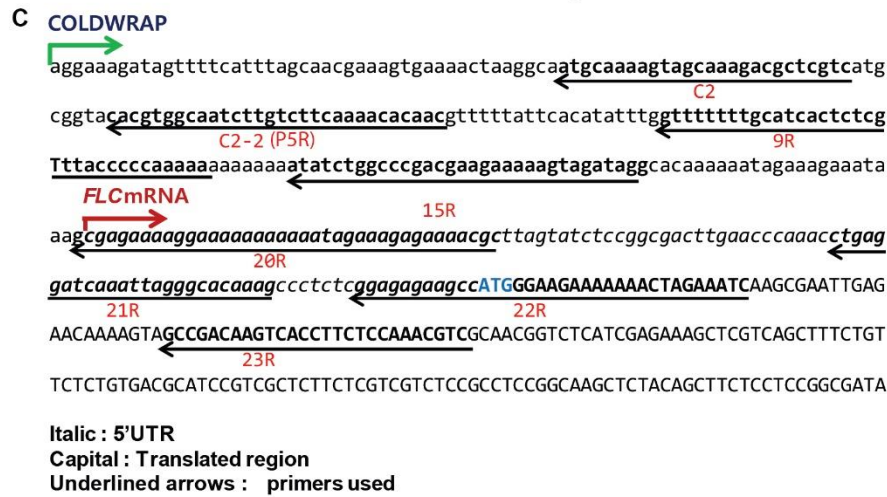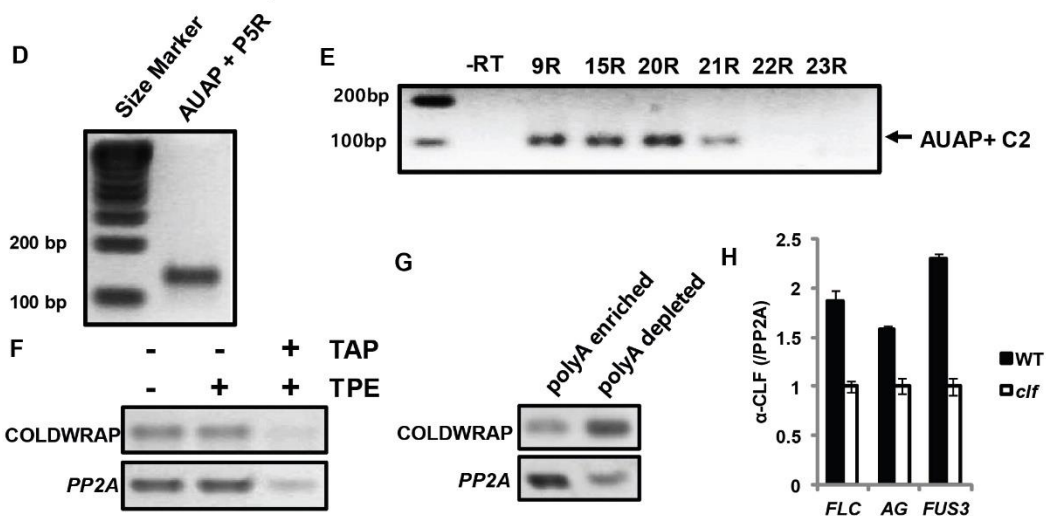

**Supplementary Figure S1. Related to Figure 1. Identification of COLDWRAP. (A)** Schematic representation of RNA immunoprecipitation (RIP) followed by tiled quantitative RT-PCR across *FLC* region. **(B)** Relative levels of RNA retrieved by RIP using anti-CLF (upper panel) and IgG (lower panel) followed by quantitative RT-PCR. AG: AGAMOUS, NV, non-vernalized. 20V, 20 days of vernalization. 40V, 40 days of vernalization. Data (mean  $\pm$  SD of quantitative PCR;  $n=2$ ). **(C)** The sequence of COLDWRAP-containing region. The transcription start site of COLDWRAP is indicated as a green arrow. The transcription start site of *FLC* mRNA is indicated as a red arrow. Locations of primers used are indicated as underlined black arrows. **(D)** Strand-specific amplification of COLDWRAP using 5' RACE to determine the direction and the 5' end of COLDWRAP. Abridged Upstream Anchor primer (AUAP) with a COLDWRAP-specific P5 reverse primer was used to detect sense strand of COLDWRAP. P5 forward primer did not produce any detectable amplification (data not shown). Location of P5 reverse primer is indicated in (A&B). **(C~D)** COLDWRAP is transcribed in a sense direction relative to *FLC* mRNA. COLDWRAP is ~ 316 bases long and overlaps with 5' end of *FLC* mRNA. **(E)** 5' RACE followed by 3' end tiled RT-PCR to determine the 3' end of COLDWRAP. Total RNA purified from 40 days-vernalized samples was used for this analysis. Locations of primers used are indicated in (A). -RT; without reverse transcription. **(F)** Treatment of Terminator 5'-Phospho dependent exonuclease (TPE) alone does not degrade COLDWRAP, but the treatment with both TPE and Tobacco Acid Pyrophosphatase (TAP) does degrade the COLDWRAP. PP2A was used as a 5' capped mRNA control. **(G)** COLDWRAP is detected from ploy (A)-depleted fraction. Polyadenylated *PP2A* (At1g13320) was used as a control. **(H)** Chromatin immunoprecipitation using anti-CLF antibody. Relative levels of enrichments were shown between wild type and *clf* mutant (*clf-29*) at known CLF target loci, *FLC*, *AGAMOUS* (*AG*) and *FUSCA3* (*FUS3*). Data (mean  $\pm$  SD of quantitative PCR;  $n = 3$ ).

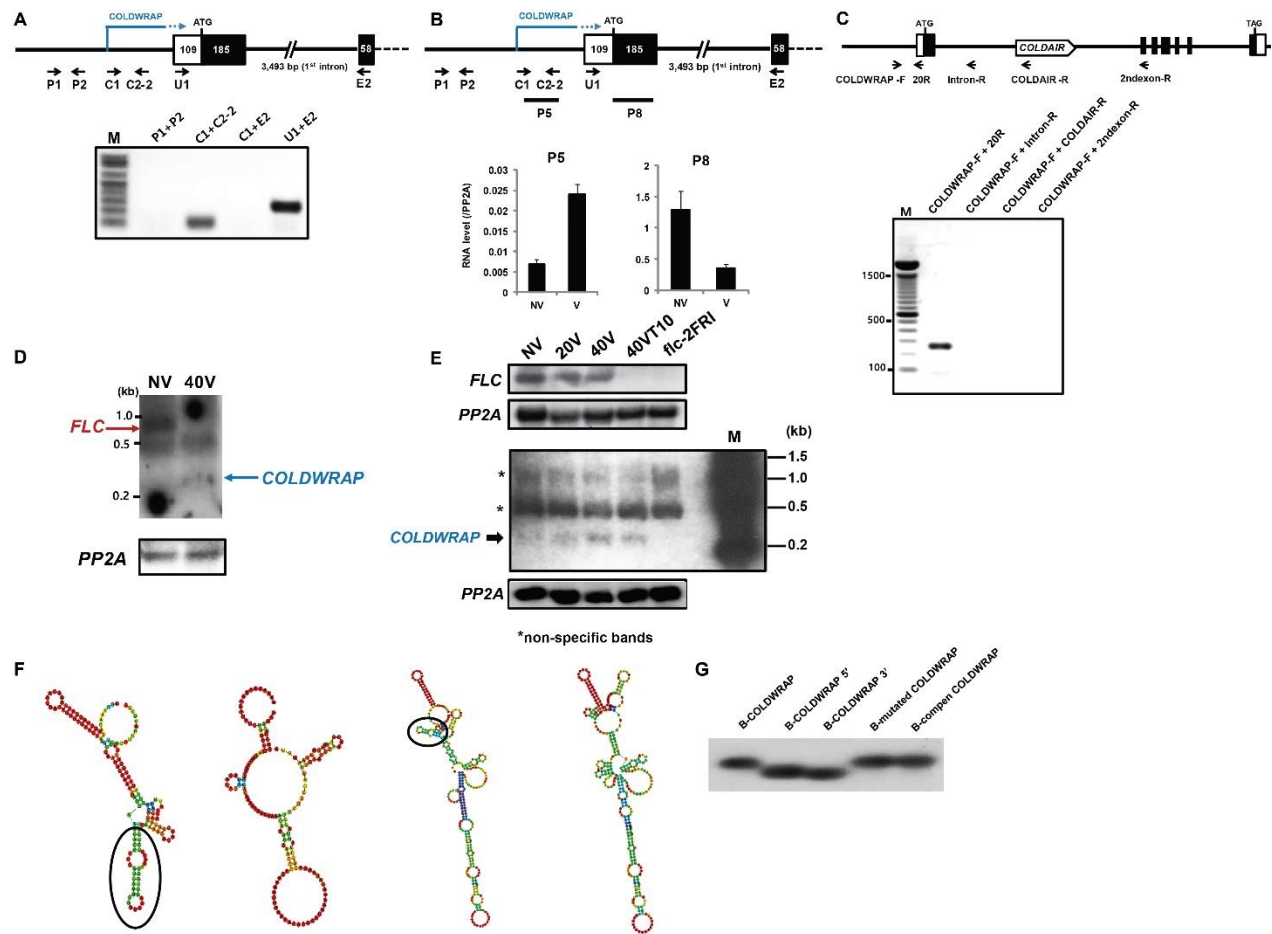

**Supplementary Figure S2. Related to Figure 1.** Characterization of COLDWRAP. **(A)** COLDWRAP is not an alternative *FLC* mRNA transcript. Relative positions of primer sets used in RT-PCR are indicated around the 5' part of *FLC* region (top). RT-PCR analyses using different combinatorial primer sets are shown (bottom). The *FLC* mRNA transcript was detected by primer set of forward primer U1 (5'UTR) and reverse primer E2 (the 2<sup>nd</sup> exon of *FLC*). Total RNA purified from 40 days-vernalized samples was used for this analysis. M, size marker. **(B)** Expression patterns of two different transcribed regions (P5 and P8) at 5' end of *FLC*. Schematic representation of relative positions of primer sets used in RT-PCR are indicated around 5' part of *FLC* region (top). Relative levels of RNA expressions were calculated compared to the control, *PP2A* (bottom). Mean  $\pm$  SD of quantitative RT-PCR data are shown (biological replicates  $n = 3$ ). NV, non-vernalized. V, 40 days of vernalization treatment. **(C)** COLDWRAP is not a part of COLDAIR. Schematic representation of relative positions of primer sets used in RT-PCR are indicated at *FLC* region (top). RT-PCR analyses using different combinatorial primer sets are shown (bottom). **(C, D)** COLDWRAP is not an unspliced or alternately spliced version of *FLC* mRNA. COLDWRAP is not co-amplified with either *FLC* mRNA or unspliced *FLC* (**D**) RNA blot analysis using full length COLDWRAP anti-sense RNA probe. 316 bases of full-length antisense COLDWRAP overlap with 5'UTR of *FLC*, and, therefore, detect both COLDWRAP and *FLC* mRNA transcript. NV, non-vernalized. 40V, 40 days of vernalization treatment. **(E)** RNA blot analysis using *FLC* anti-sense probe (top) and non-overlapping COLDWRAP (157 bp of 5' COLDWRAP) anti-sense RNA probe (middle), and *PP2A* anti-sense probe (bottom). RNA samples were prepared from the wild type and *flc-2FRI* (in which the COLDWRAP region is deleted). Asterisks indicate non-specific bands. NV, non-vernalized. 10V, 10 days of vernalization. 20V, 20 days of vernalization. 40V, 40 days of vernalization. 40VT10, 40 days of vernalization followed by 10 days of normal growth temperature. Total RNA from vernalized *flc-2FRI* was used as a negative control. **(D, E)** *PP2A* was used as a loading control. M; RNA size marker. **(F)** Predicted secondary structure of COLDWRAP. Stem-and-loop structures subject to mutations shown in black circle. **(G)** RNA stability was not

affected by introduced mutations used for *in vitro* RNA binding assays (Fig. 1D, E). Equal amount of biotin-labeled RNAs (three microgram) were incubated in incubation buffer as described in M&M. Biotin-labeled RNAs were separated on RNA gel and visualized using BrightStar Biotin detection Kit (Ambion, TX, USA).

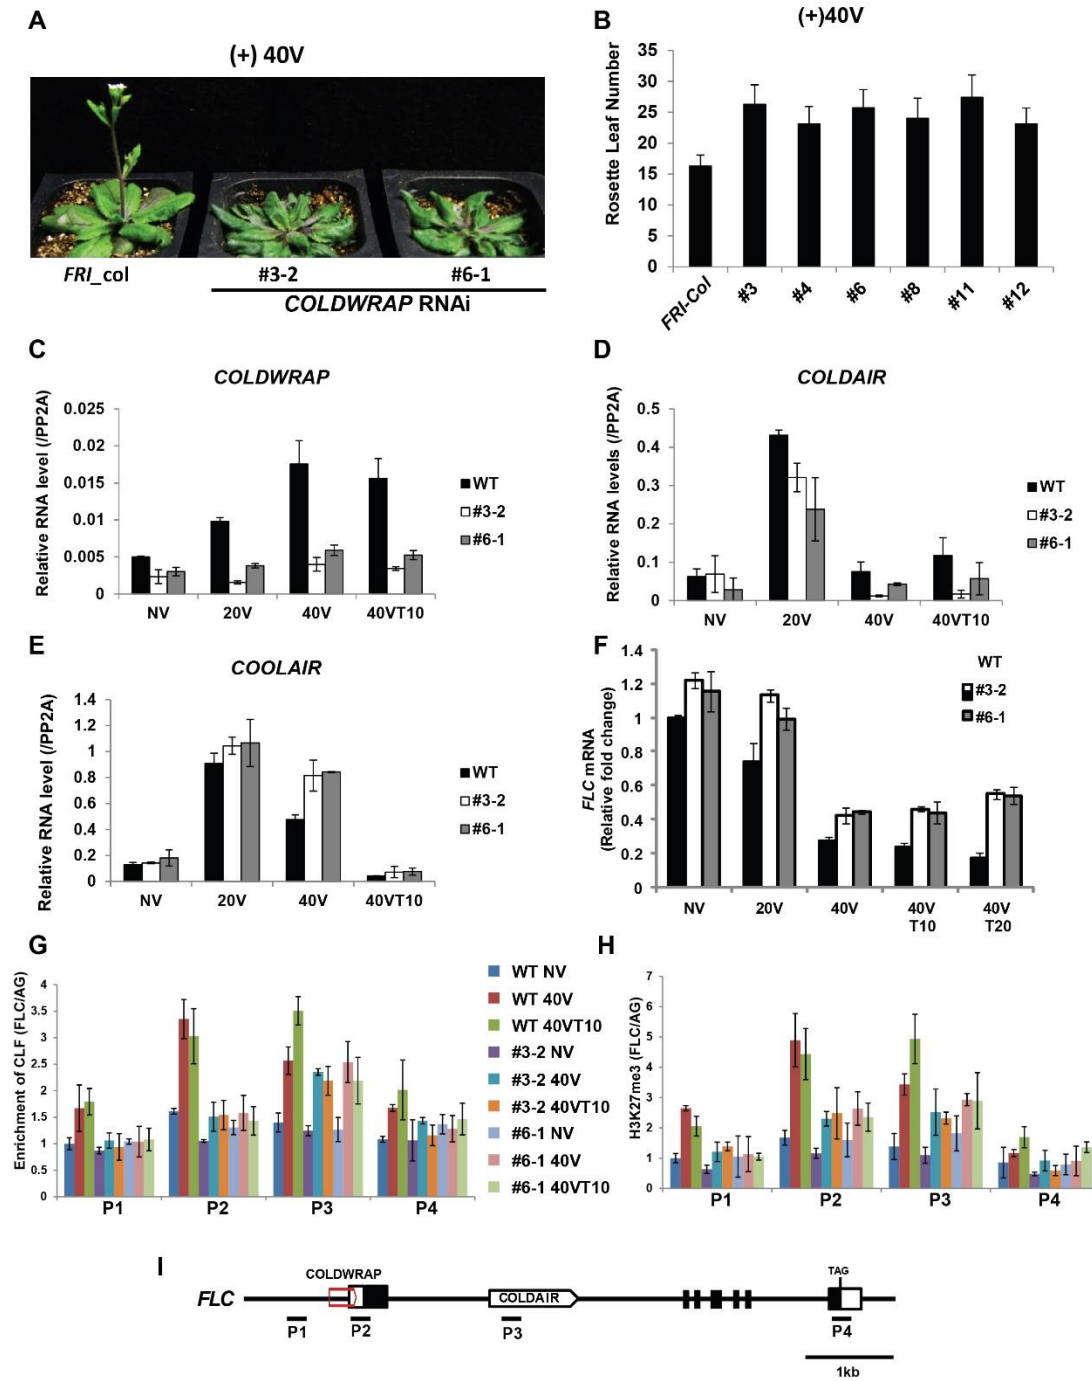

**Supplementary Figure S3. Related to Figure 2. COLDWRAP knockdown compromises vernalization response. (A)** Representative COLDWRAP knockdown lines (#3-2, #6-1) flower later compared to the wild type (WT) after vernalization. **(B)** Flowering times of multiple COLDWRAP knockdown lines at the second generation (T2) compared to the wild type (WT; *FRI-Col*) after 40 days of vernalization. More than 9 plants for each line were used to count the number of rosette leaves at the timing of flowering. **(C)** Expressions of COLDWRAP in two representative COLDWRAP knockdown lines (#3-2, #6-1) and in the wild type (WT) during the course of vernalization. **(D)** Expressions of COLDAIR transcripts in two representative COLDWRAP knockdown lines (#3-2, #6-1) and in the

wild type (WT) during the course of vernalization. **(E)** Expressions of COOLAIR transcripts in two representative COLDWRAP knockdown lines (#3-2, #6-1) and in the wild type (WT) during the course of vernalization. **(F)** Expressions of *FLC* in two representative COLDWRAP knockdown lines (#3-2, #6-1) and in the wild type (WT) during the course of vernalization. **(C-F)** Relative levels were calculated compared to the control, *PP2A*. Mean  $\pm$  SD of quantitative RT-PCR data are shown (biological replicates  $n=3$ ). NV, non-vernalized. 20V, 20 days of vernalization treatment. 40V, 40 days of vernalization treatment. 40VT10, 40 days of vernalization treatment followed by 10 days of normal growth temperature. **(G)** Changes in occupancy of CLF at *FLC* chromatin during the course of vernalization. **(H)** Changes in enrichment of H3K27me3 at *FLC* chromatin during the course of vernalization. **(G, H)** Data (mean  $\pm$  SD of quantitative PCR; biological replicates  $n=3$ ). **(I)** Schematic representation of the *FLC* genomic region. Relative positions of primer sets used for ChIP assays are shown (P1 ~ P4).

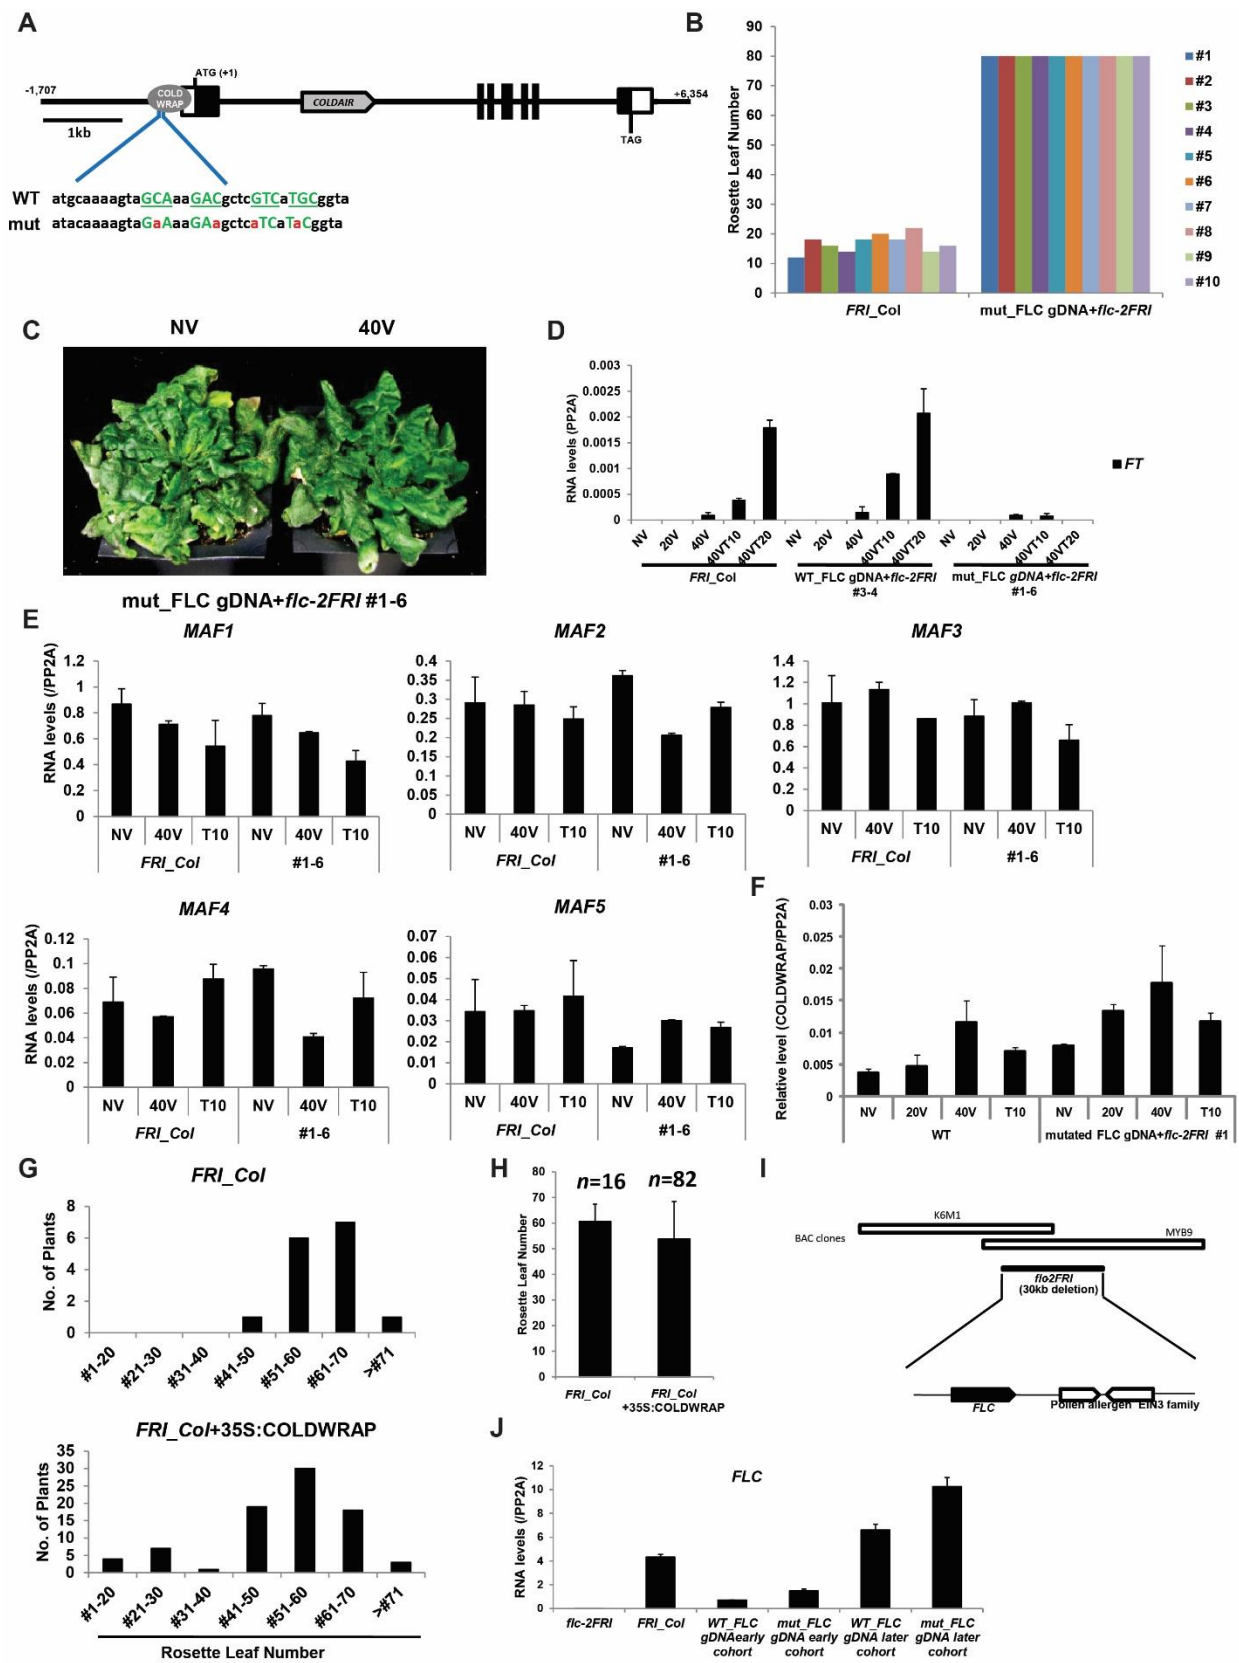

**Supplementary Figure S4. Related to Figures 2 ~ 4.** (A) Diagrams to depict the extent of transgenes carrying the wild-type *FLC* and the mutant COLDWRAP. Nucleotides forming stem part of stem-loop structure are in green capital letters. Mutated nucleotides disrupting stem structure are in red lower case letters. (B) Flowering times of 10 randomly selected transgenic lines carrying the “mutant COLDWRAP in *flc-2* mutant background at the second generation (T2) compared to the wild type (WT; *FRI-Col*) after 40 days of vernalization. More than 9 plants for each line were used to count the number of rosette leaves at the timing of flowering. (C) Flowering behavior of the representative transgenic lines carrying the mutant COLDWRAP in *flc-2* mutant background. (D) *FT* mRNA expression in wild type (*FRI-Col*), a representative transgenic line carrying the wild-type *FLC* in *flc-2* mutant background (WT\_FLC gDNA + *flc-2FRI* #3-4), and a representative transgenic lines carrying the mutant COLDWRAP in *flc-2* mutant background (mut\_FLCgDNA + *flc-2FRI* #1-6) during the course of vernalization. Expression of *FLOWERING LOCUS T (FT)*, a downstream target of *FLC*, remains at low levels even after vernalization, consistent with late flowering phenotype of the mutant COLDWRAP lines compared to wild type. (E) Expressions of five *FLC*-related genes in wild type (*FRI-Col*) and a representative transgenic line carrying the mutant COLDWRAP in *flc-2* mutant background (#1-6) during the course of vernalization. The transgene carrying the mutant COLDWRAP expresses COLDWRAP at comparable levels during the course of vernalization compared to the wild type. Data (fold change; mean  $\pm$  SD of quantitative RT-PCR; biological replicates  $n = 3$ ) is relative to the level of *PP2A* mRNA. Expressions of five *FLC*-related genes are not affected in the transgenic lines carrying the mutant COLDWRAP compared to the wild-type plants, and there is no COLDWRAP-like sequences found in five *FLC*-related gene loci. Therefore, COLDWRAP specifically affects the regulation of *FLC*. (F) The transgene carrying the mutant COLDWRAP expresses COLDWRAP at comparable levels during the course of vernalization compared to the wild type. Data (fold change; mean  $\pm$  SD of quantitative RT-PCR; biological replicates  $n = 3$ ) is relative to the level of *PP2A* mRNA. (D-F) Data (fold change; mean  $\pm$  SD of quantitative RT-PCR; biological replicates  $n = 3$ ) is relative to the level of *PP2A* mRNA. NV, non-vernalized. 20V, 20 days of vernalization treatment. 40V, 40 days of vernalization treatment. 40VT10, 40 days of vernalization treatment followed by 10 days of normal growth temperature. 40VT20, 40 days of vernalization treatment followed by 20 days of normal growth temperature. (G) Flowering times of the wild type (*FRI-Col*) and overexpression of COLDWRAP (*FRI-Col* + 35S::COLDWRAP) without vernalization. Distribution of flowering times in the wild type (upper panel) and the primary transgenic lines (lower panel). (H) average flowering times of the wild type and the primary transgenic lines. (I) Genomic structure showing the deleted region in *flc-2FRI* (Michaels and Amasino, 1999). (J) The level of *FLC* expression of 12 randomly selected T2-pools of transgenic lines carrying the mutant COLDWRAP (mut\_FLC) in *flc-2* mutant background and the wild-type COLDWRAP (WT\_FLC) at the second generation (T2) compared to the wild type (WT; *FRI-Col*). Due to the *FLC* transgene variability, transgenic lines were grouped together based on their flowering time before vernalization.

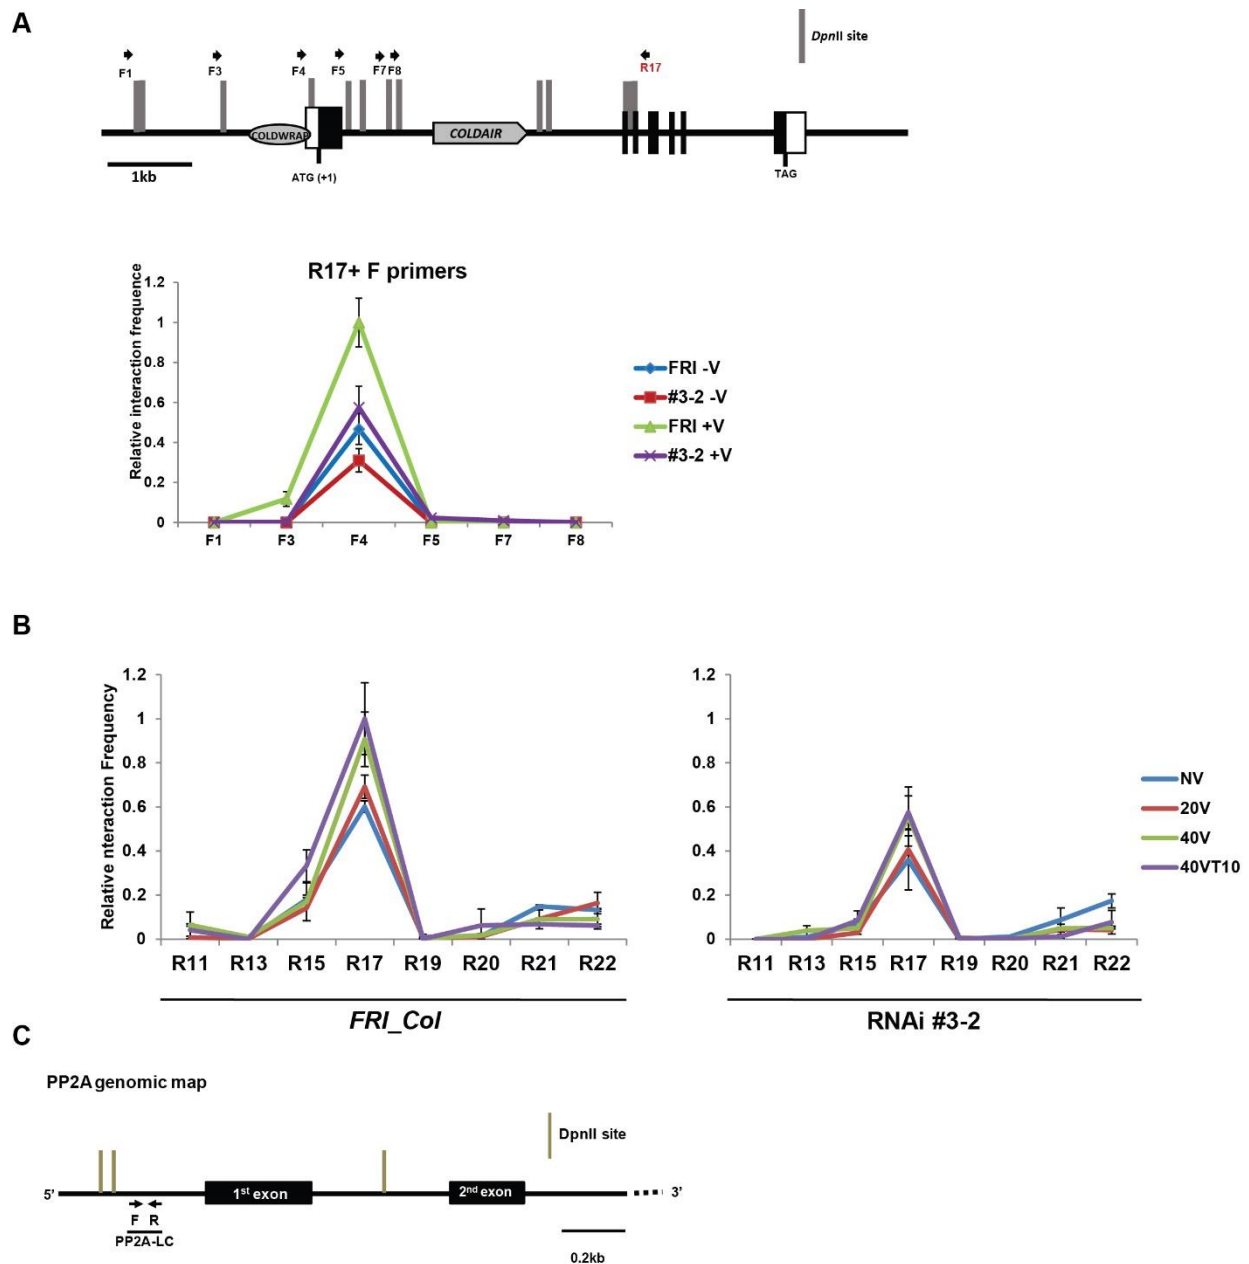

**Supplementary Figure S5. Related to Figures 5 and 6.** Chromatin conformation capture (3C) assay at *FLC* by vernalization. **(A)** Relative fold changes of interaction frequency in 3C assay between different regions of *FLC* by vernalization were indicated. Relative interaction between F4 and R17 are set as 1. Data (mean  $\pm$  SD of quantitative 3C; biological replicates  $n = 2$ ). Schematic representations of the *FLC* genomic region were given at upper panel. **(B)** Relative fold changes of interaction frequency in 3C assay between WT and COLDWRAP RNAi line (#3-2) of *FLC* during the course of vernalization. NV, non-vernalized, 10V, 10 days vernalized, 20V, 20 days vernalized, 30V, 30 days vernalized, 40V, 40 days vernalized, 40VT10, 40 days vernalized and followed by 10 days of normal growth temperature. Relative interaction between F4 and R17 of WT sample is set as 1. Data (mean  $\pm$  SD of quantitative 3C; biological replicates  $n = 2$ ). **(C)** Schematic representation of the *PP2A* regions used as a control (see materials and methods for the detail).

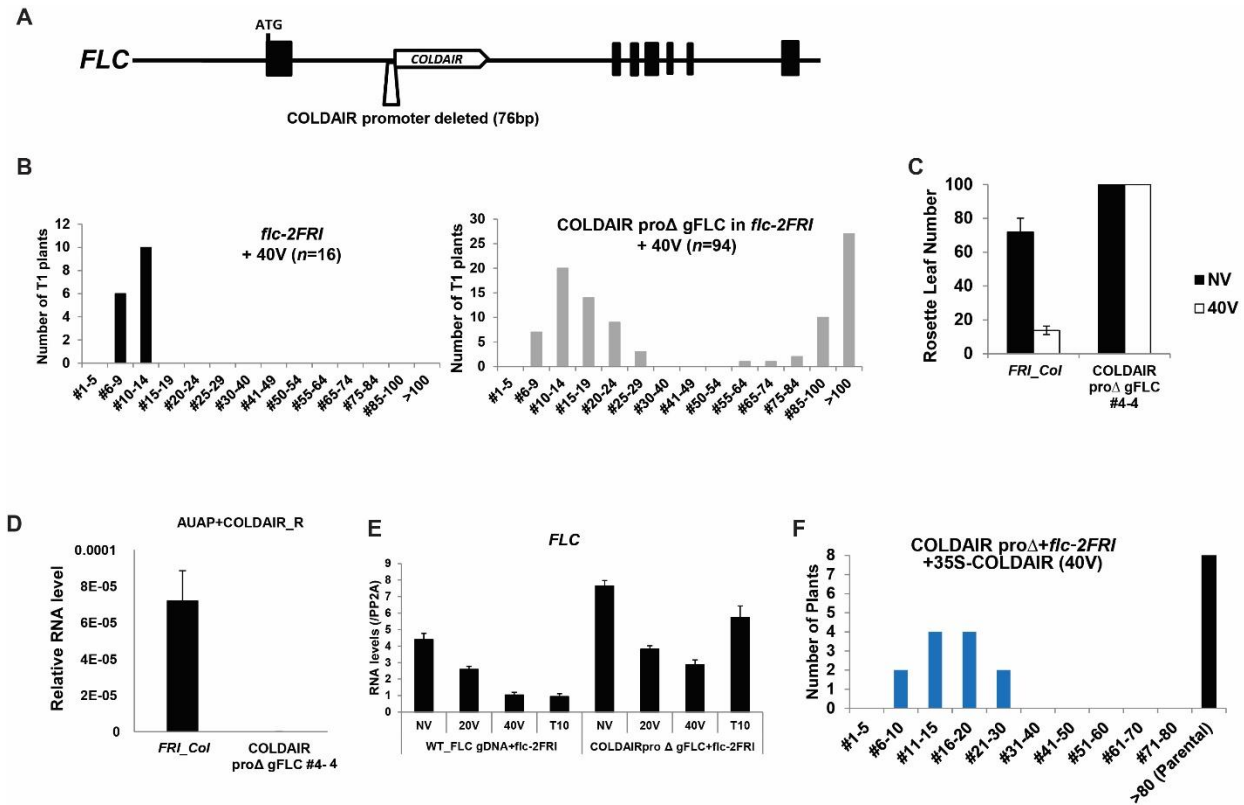

**Supplementary Figure S6. Related to Figure 6.** COLDAIR promoter deletion lines. **(A)** Schematic representation of the transgene in which 76 bp of the putative COLDAIR intrinsic promoter is deleted. **(B)** Flowering times of *flc-2FRI* (left) and the primary transgenic lines carrying the COLDAIR promoter deletion in *flc-2* mutant background after vernalization (right;  $n = 94$ ). *X*-axis; range of rosette leaf numbers. **(C)** Flowering times of a representative transgenic lines carrying the COLDAIR promoter deletion in *flc-2* mutant background without (NV) and with (40V) vernalization. **(D)** COLDAIR is not expressed in a representative transgenic line (#4-4) carrying the COLDAIR promoter deletion in *flc-2* mutant background. Data (fold change; mean  $\pm$  SD of quantitative RT-PCR; biological replicates  $n = 3$ ) is relative to the level of *PP2A* mRNA **(E)** FLC mRNA expression patterns in a representative transgenic line (#4-4) carrying the COLDAIR promoter deletion in *flc-2* mutant background. *FLC* is de-repressed by vernalization in a representative transgenic line (#4-4) carrying the COLDAIR promoter deletion in *flc-2* mutant background. Data (fold change; mean  $\pm$  SD of quantitative RT-PCR; biological replicates  $n = 3$ ) is relative to the level of *PP2A* mRNA. **(F)** Restoration of the vernalization response by 35S::COLDAIR in a transgenic line (#4-4) carrying the COLDAIR promoter deletion. Flowering times of the primary 35S::COLDAIR transgenic lines ( $n = 12$ ; blue bars) compared to the prenatal (#4-4;  $n = 8$ ; black bar) after vernalization. *X*-axis; range of rosette leaf numbers
